# Supplementary material for: Application of Horner–Wadsworth–Emmons olefination for the synthesis of granulatamide A, its E isomer and other amides of tryptamine
Source: Royal Society of Chemistry journal article supplement (doi:10.1039/c5nj03533c), 2016-01-01

## SUPPORTING INFORMATION

### Application of Horner–Wadsworth–Emmons olefination for the synthesis of Granulatamide A, its *E* isomer and other amides of tryptamine

Deepali Pakhare<sup>a</sup>, and Radhika Kusurkar\*<sup>a</sup>

<sup>a</sup>*Department of Chemistry, Savitribai Phule Pune University (former University of Pune),*

*Pune - 411 007, Maharashtra, India*

\*[rsk@chem.unipune.ac.in](mailto:rsk@chem.unipune.ac.in)

#### Contents

|                                                                                   |            |
|-----------------------------------------------------------------------------------|------------|
| <sup>1</sup> H, <sup>13</sup> C NMR spectra and HRMS for compound <b>4</b>        | <b>S2</b>  |
| <sup>1</sup> H, <sup>13</sup> C NMR spectra and HRMS for compound <b>5</b>        | <b>S3</b>  |
| <sup>1</sup> H, <sup>13</sup> C, DEPT, NOE spectra and HRMS for compound <b>1</b> | <b>S5</b>  |
| <sup>1</sup> H, <sup>13</sup> C NMR spectra and HRMS for compound <b>7</b>        | <b>S7</b>  |
| <sup>1</sup> H, <sup>13</sup> C, DEPT, NOE spectra and HRMS for compound <b>6</b> | <b>S9</b>  |
| <sup>1</sup> H and <sup>13</sup> C, DEPT spectra and HRMS for compound <b>8</b>   | <b>S11</b> |
| <sup>1</sup> H, <sup>13</sup> C NMR spectra and HRMS for compound <b>9</b>        | <b>S13</b> |

DSP-AMIDE3 BR.ESP

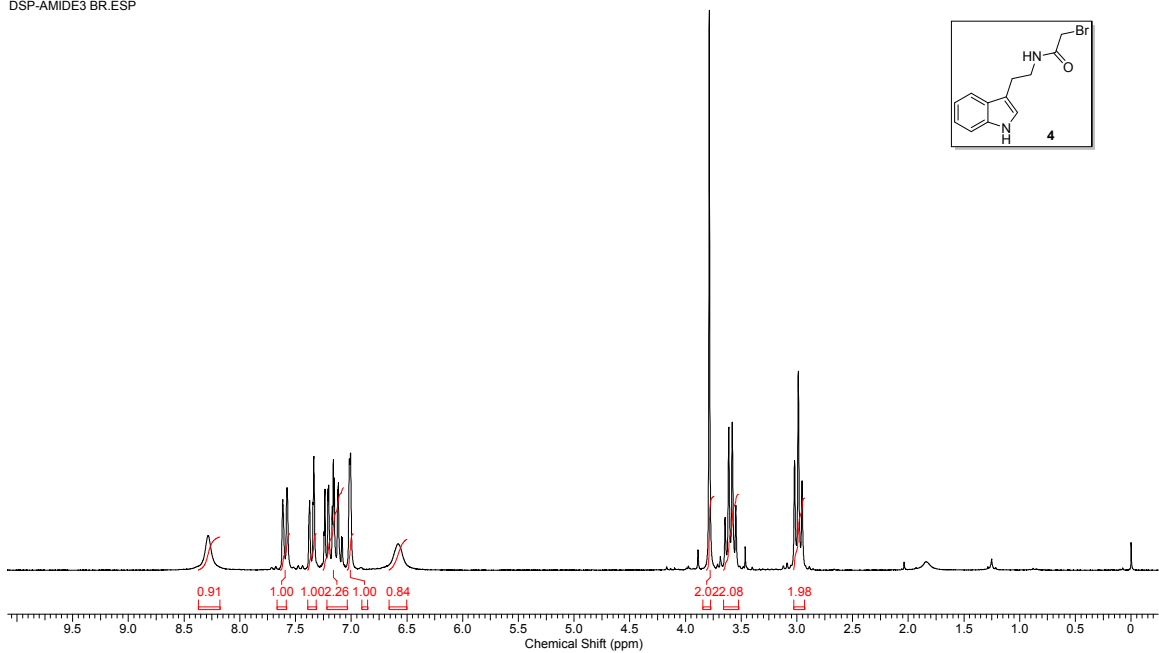

DSP-AMIDE-3 BR CARBON.ESP

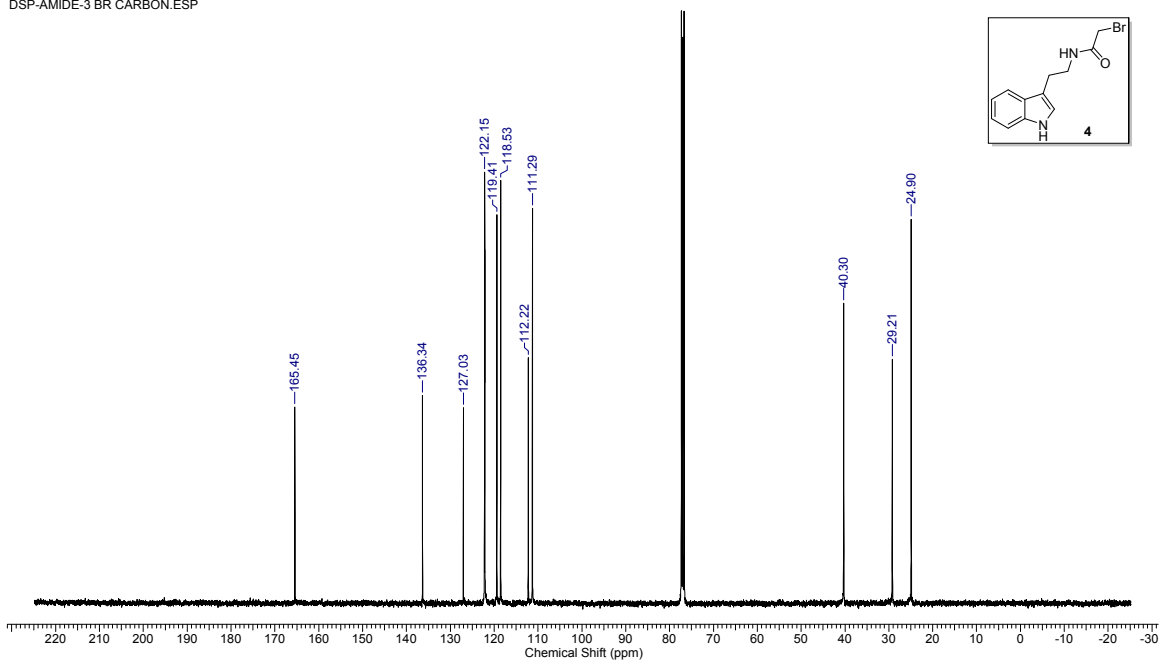

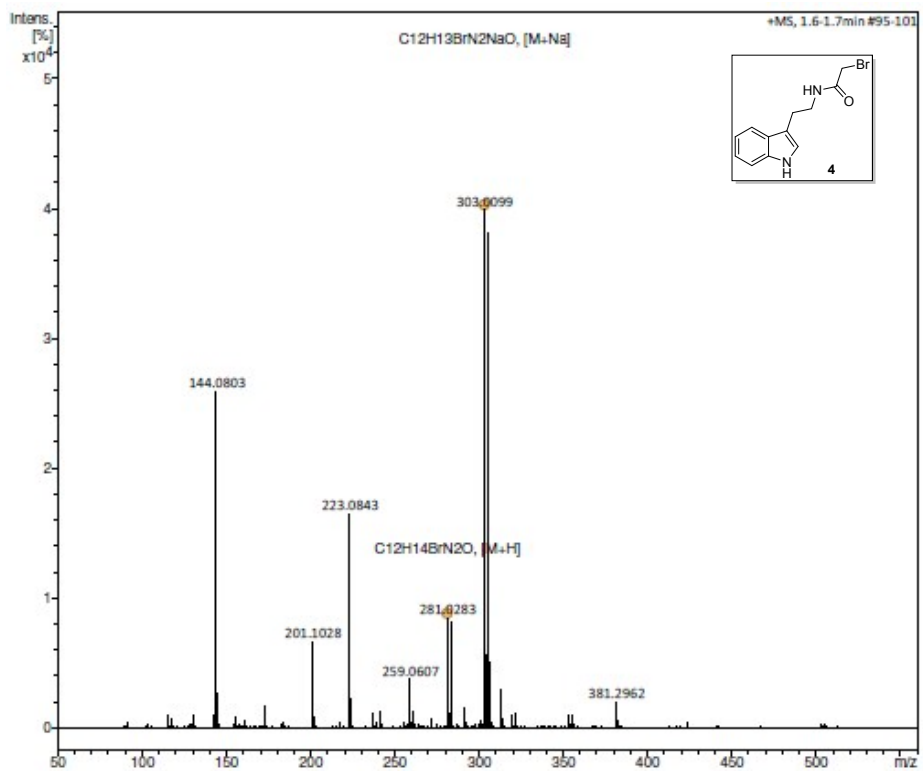

DSP CIS1.ESP

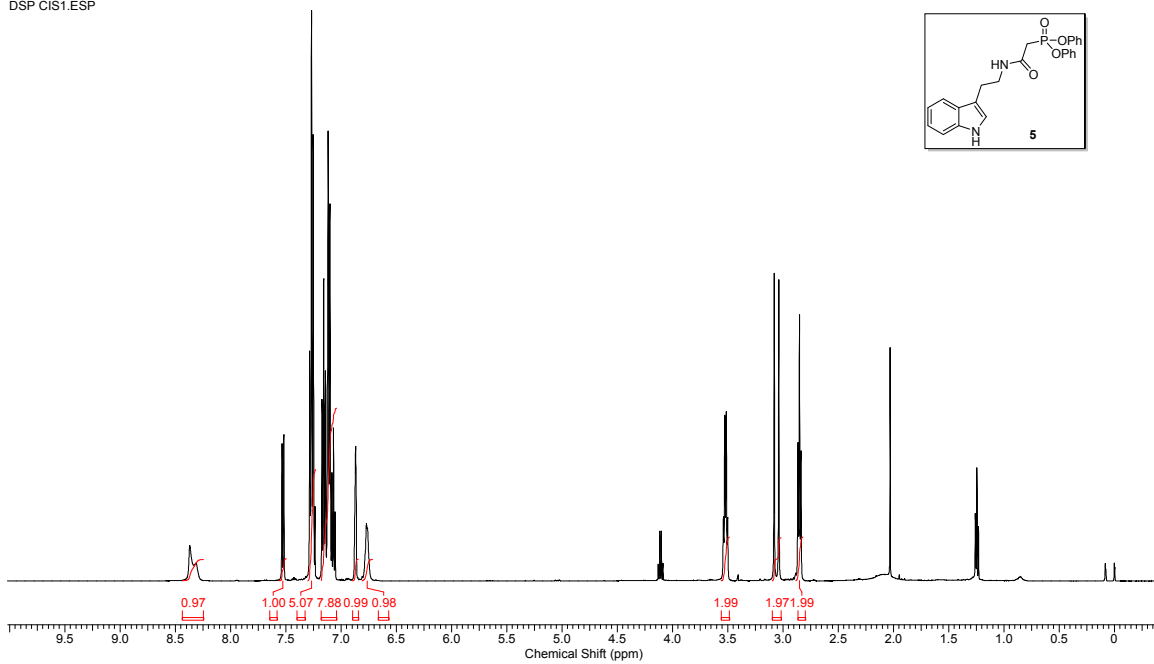

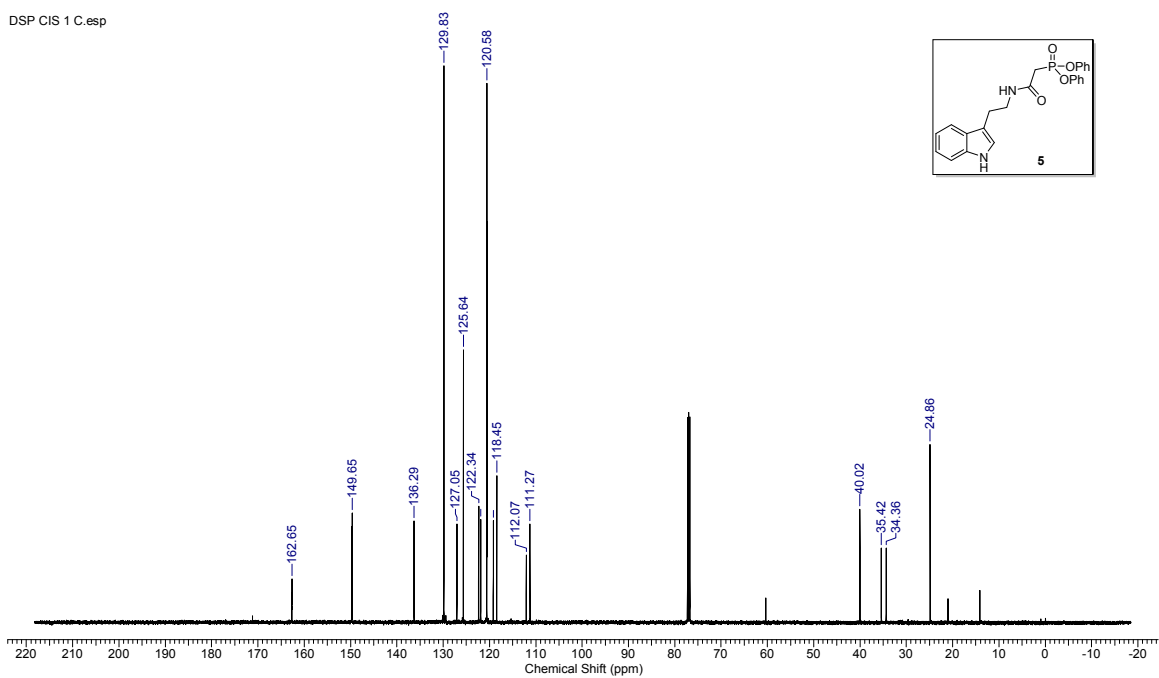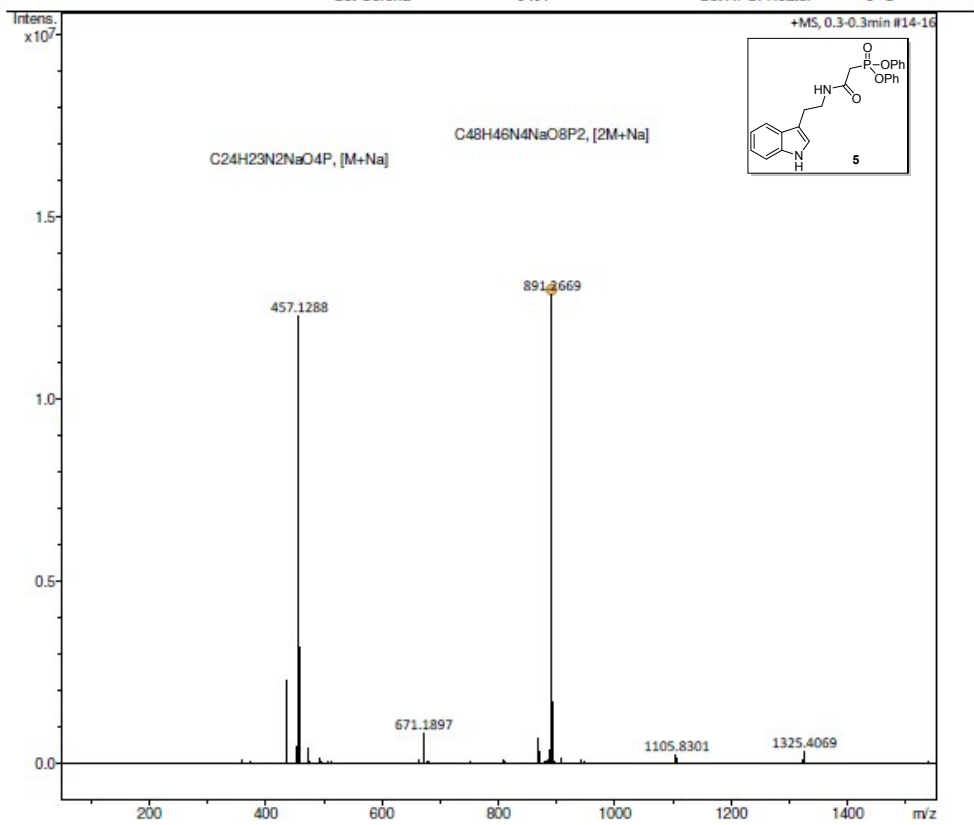

DSP CIS 1H.ESP

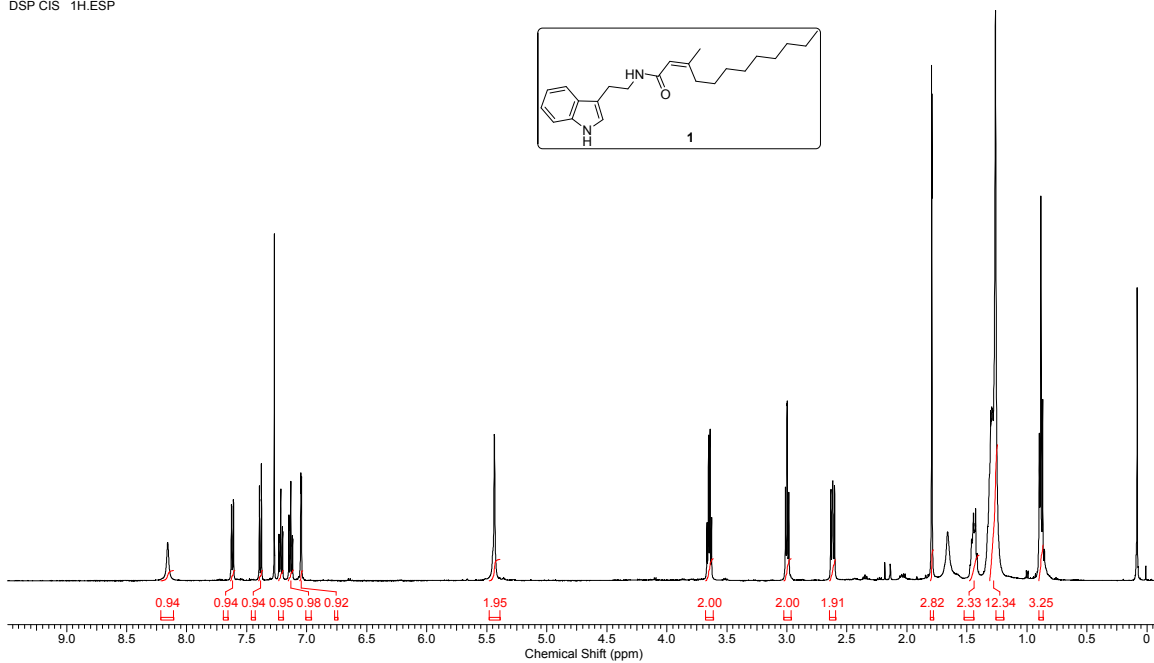

DSP CIS 13 C.ESP

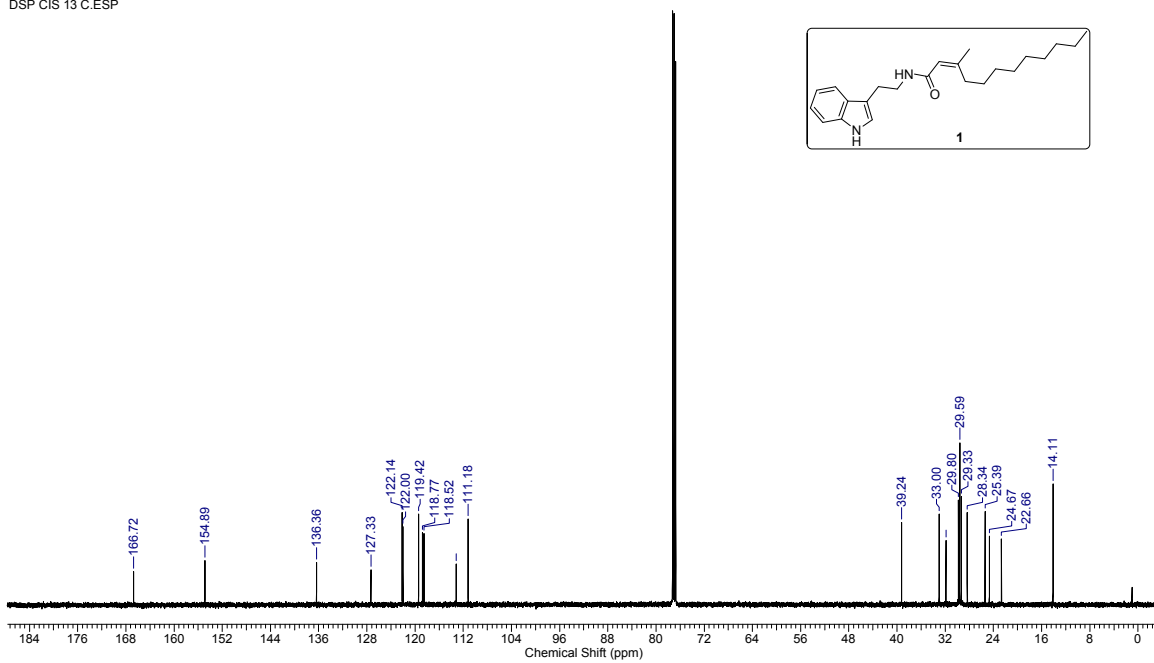

DSP CIS DEPT.ESP

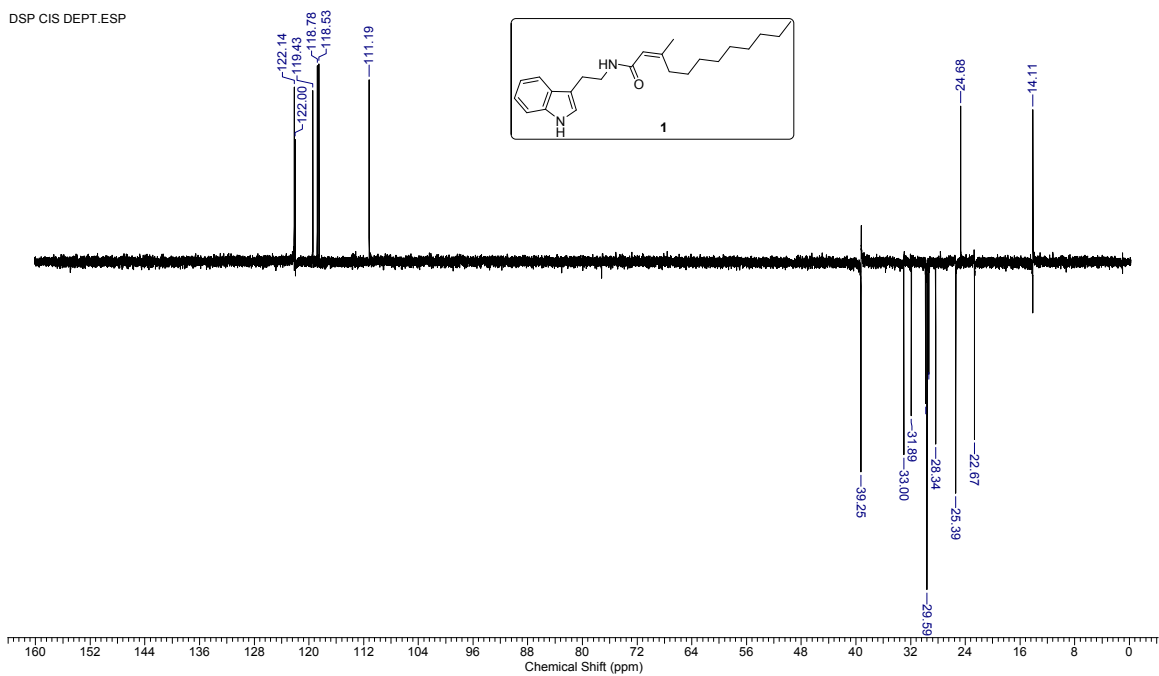

DSP-CIS-D2OEX  
SELNOGP CDCl3 {D:\RSK} root 55

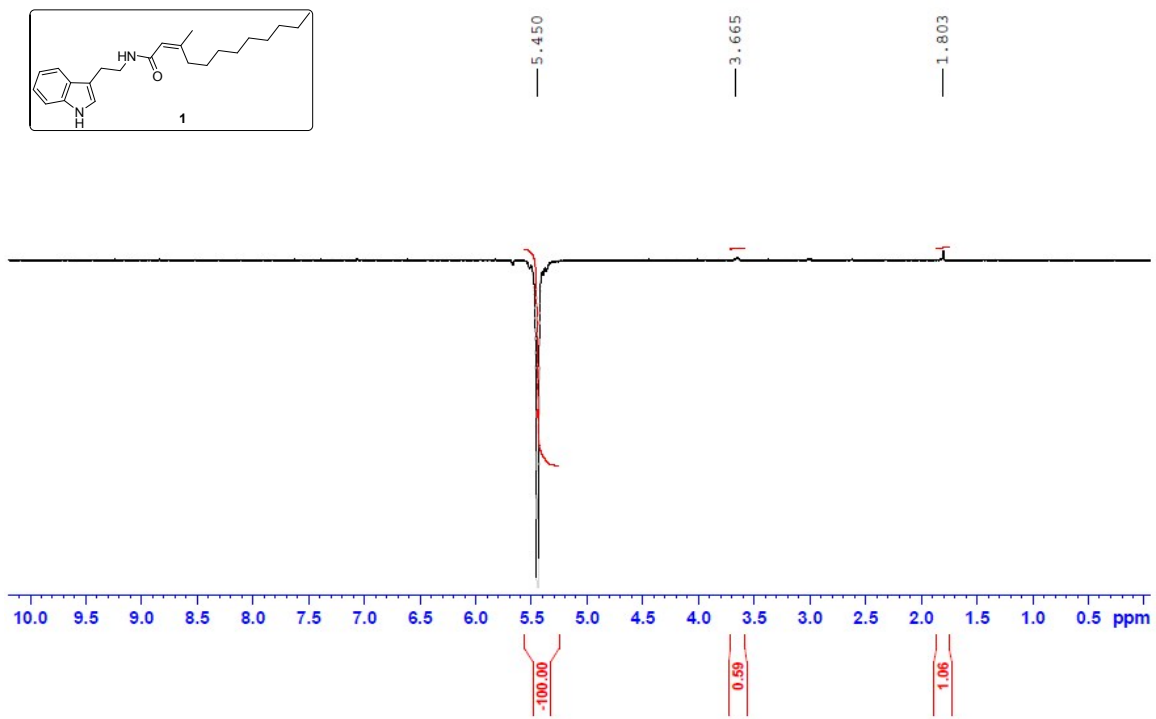

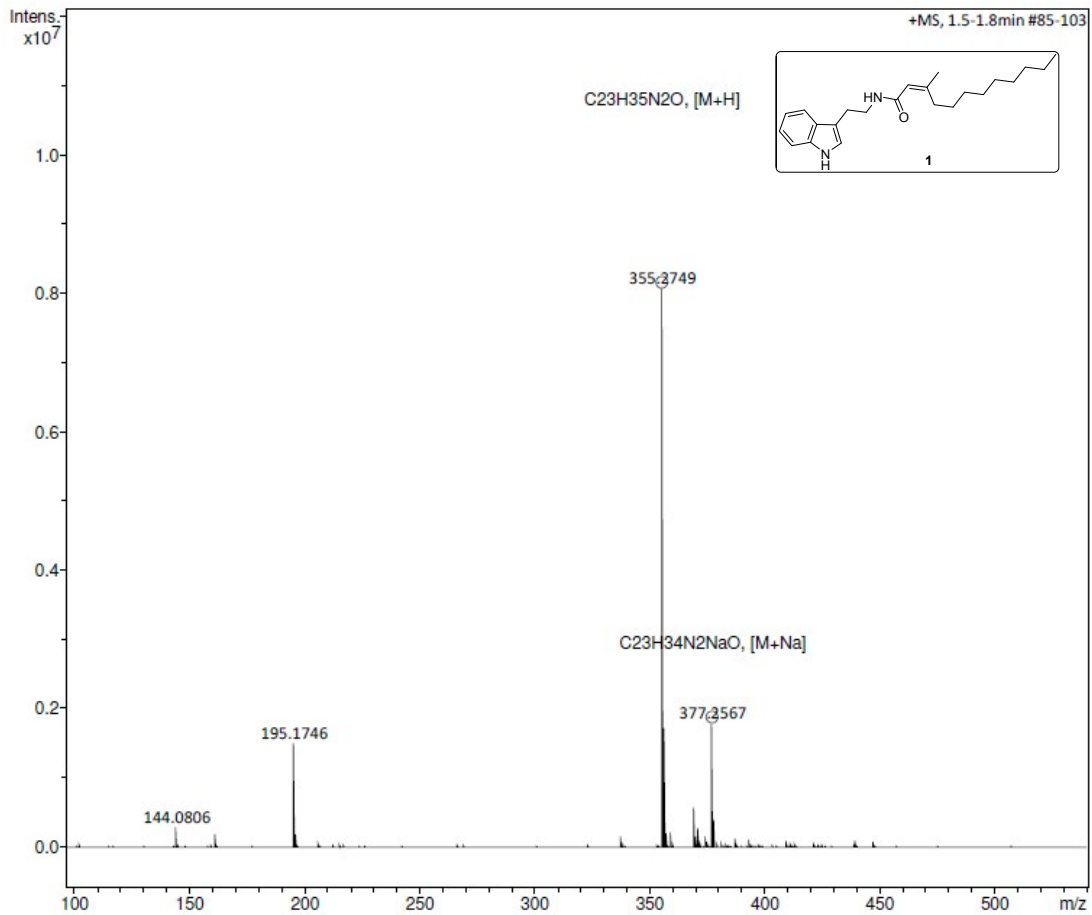

DSP T2.ESP

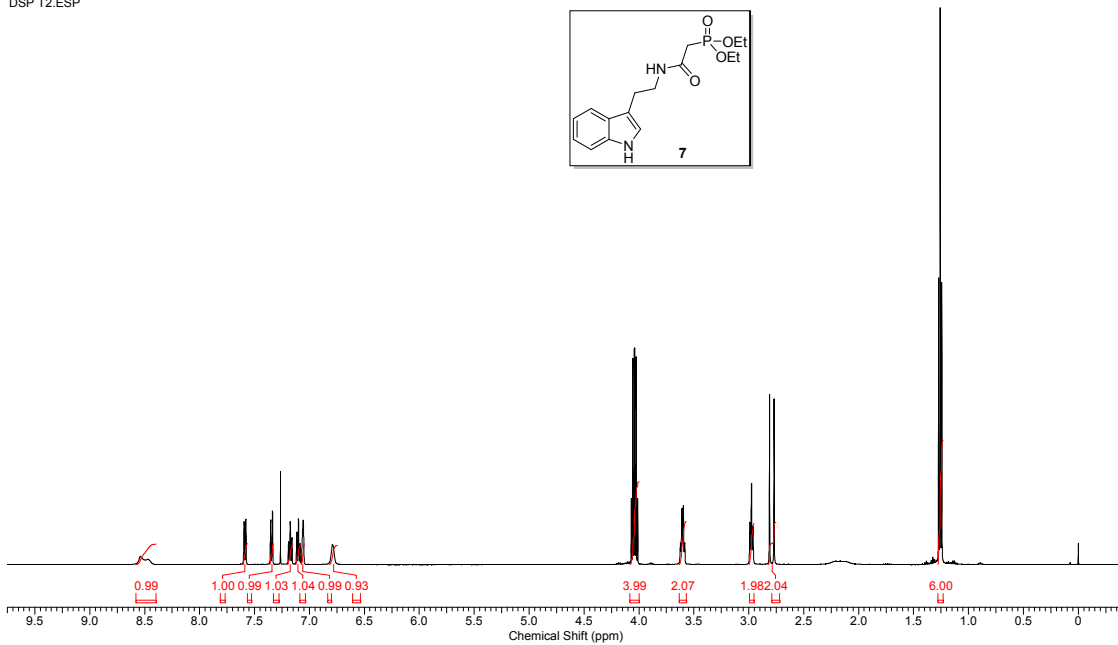

DSP T2.2.ESP

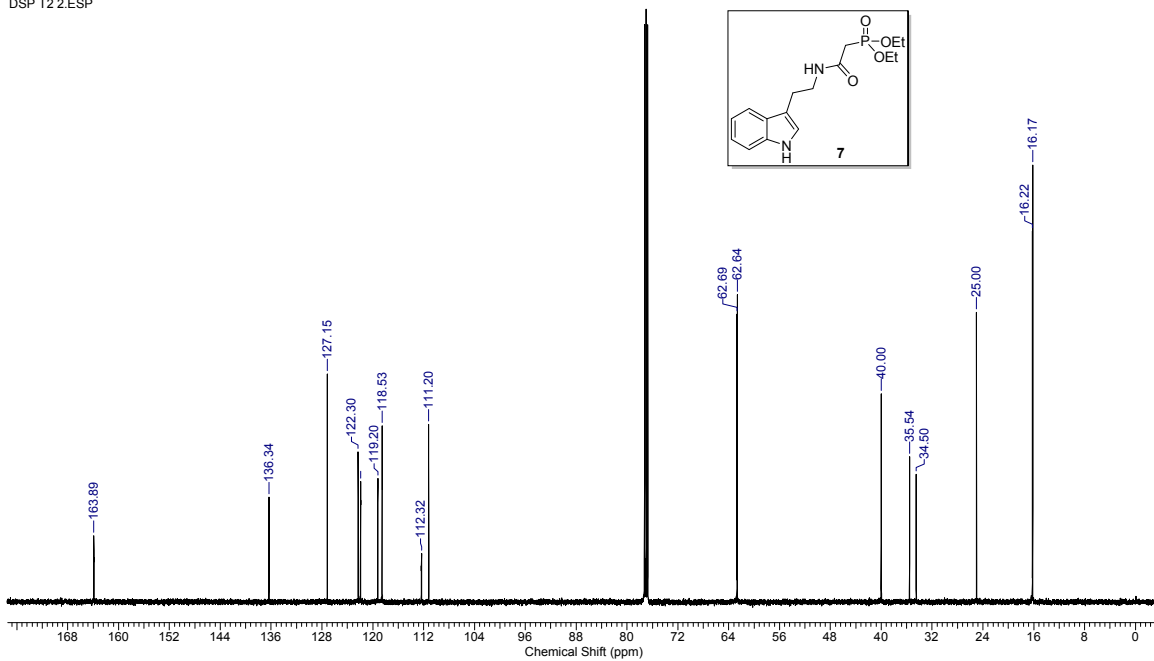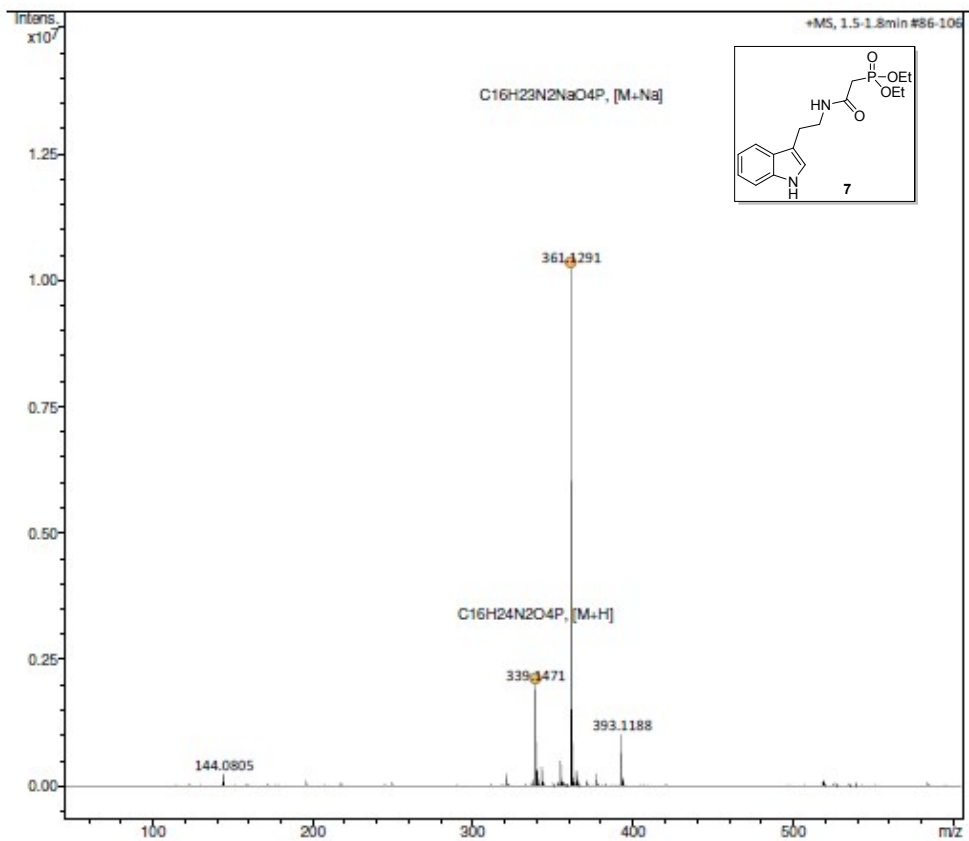



DSP TRANS 1H.ESP

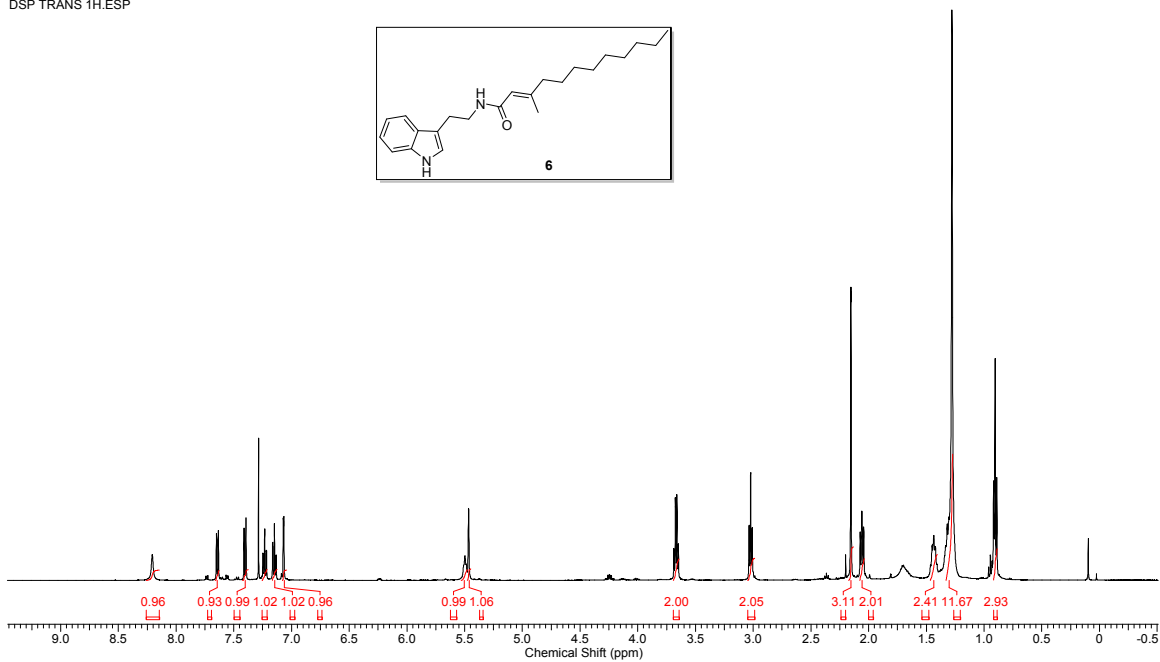

DSP TRANS 13C.ESP

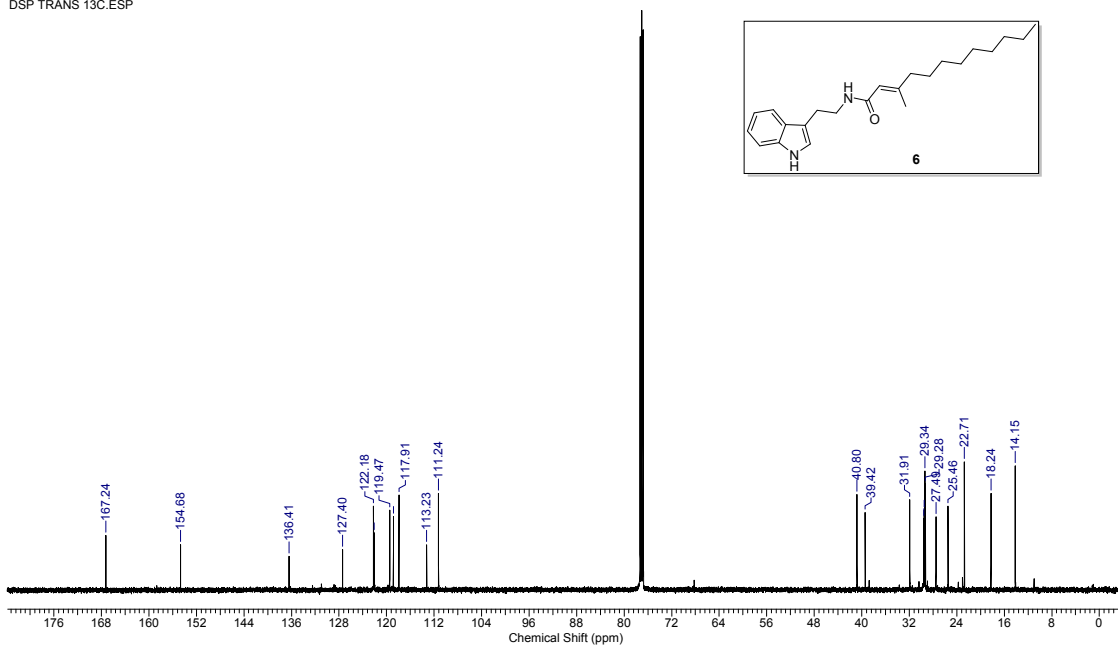

DSP TRANS DEPT.ESP

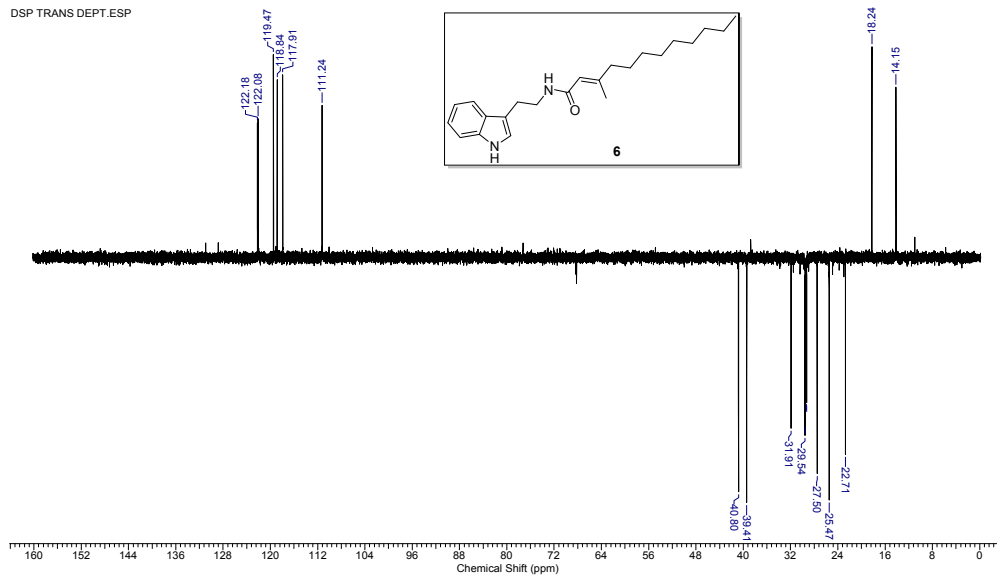

DSP-TRANS-D2OEX  
SELNOGP CDCl3 {D:\RSK} root 56

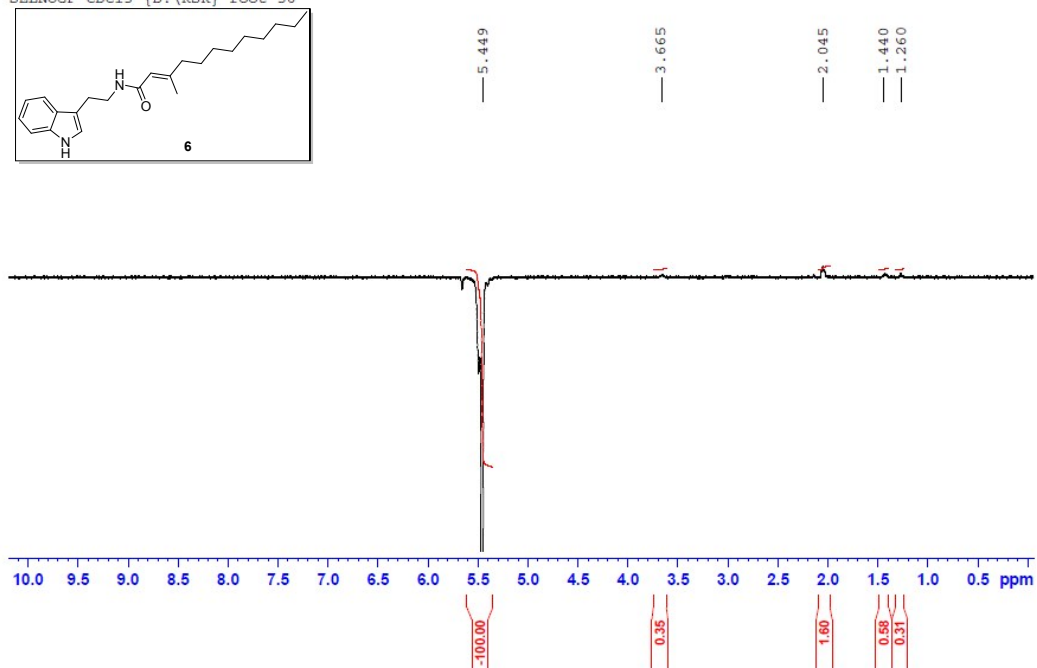

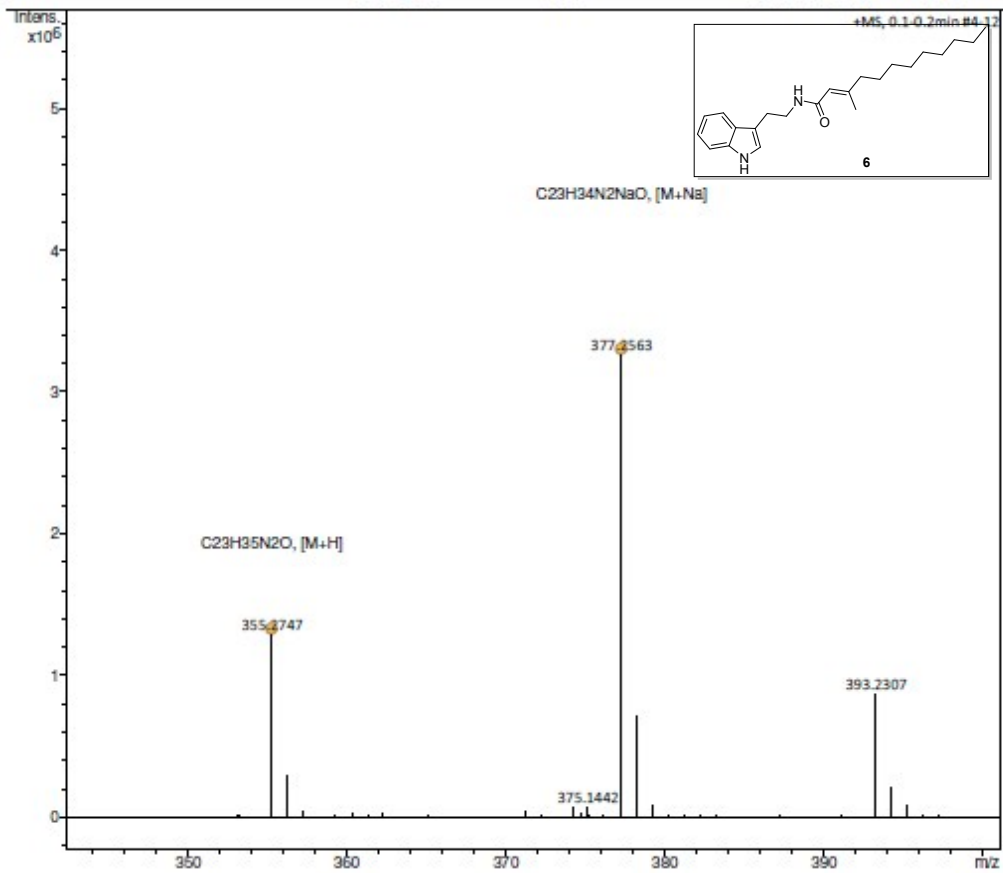

DSP WITTIG 8 1H.ESP

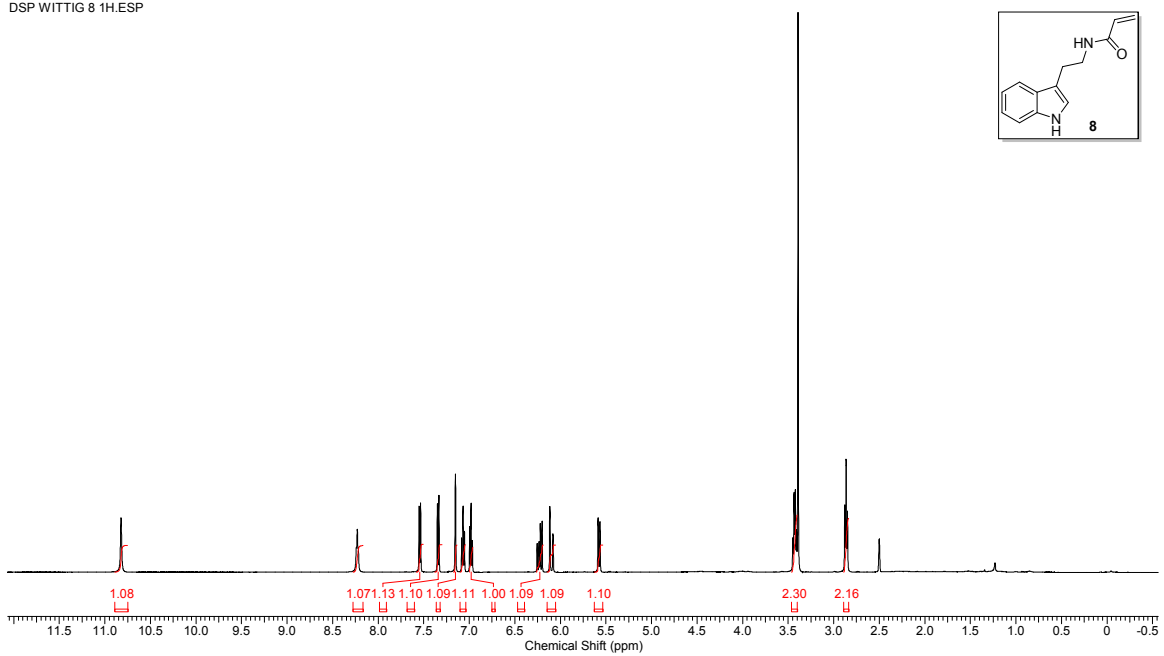

DSP WITTIG 8 C.ESP

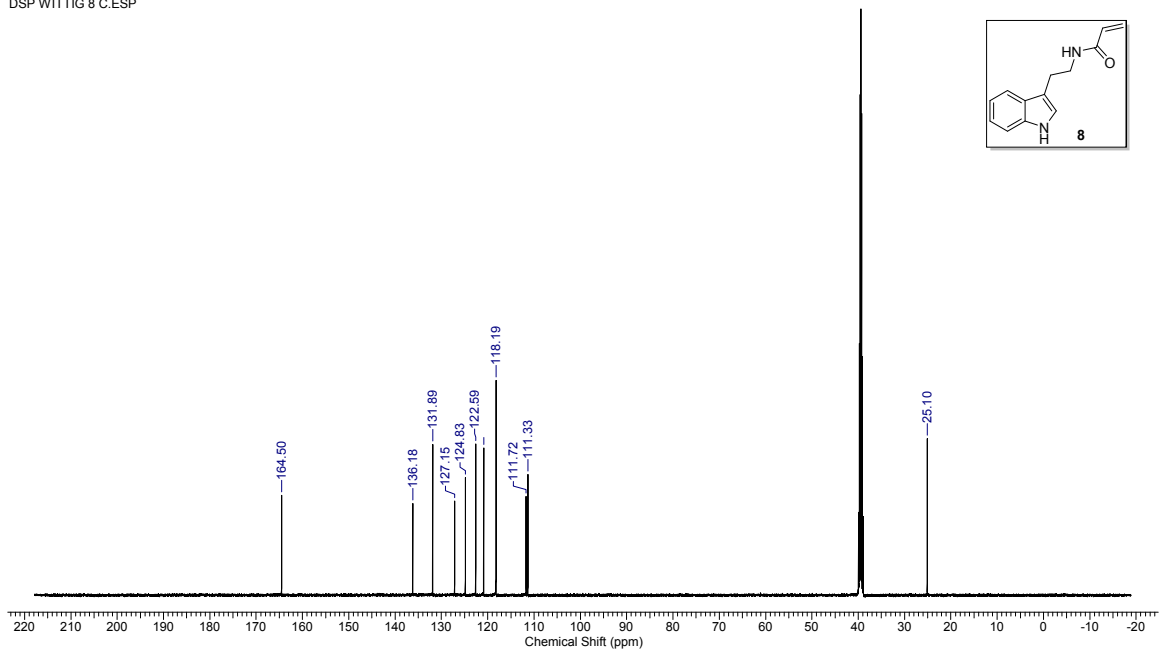

DSP WITTIG 8 DEPT.ESP

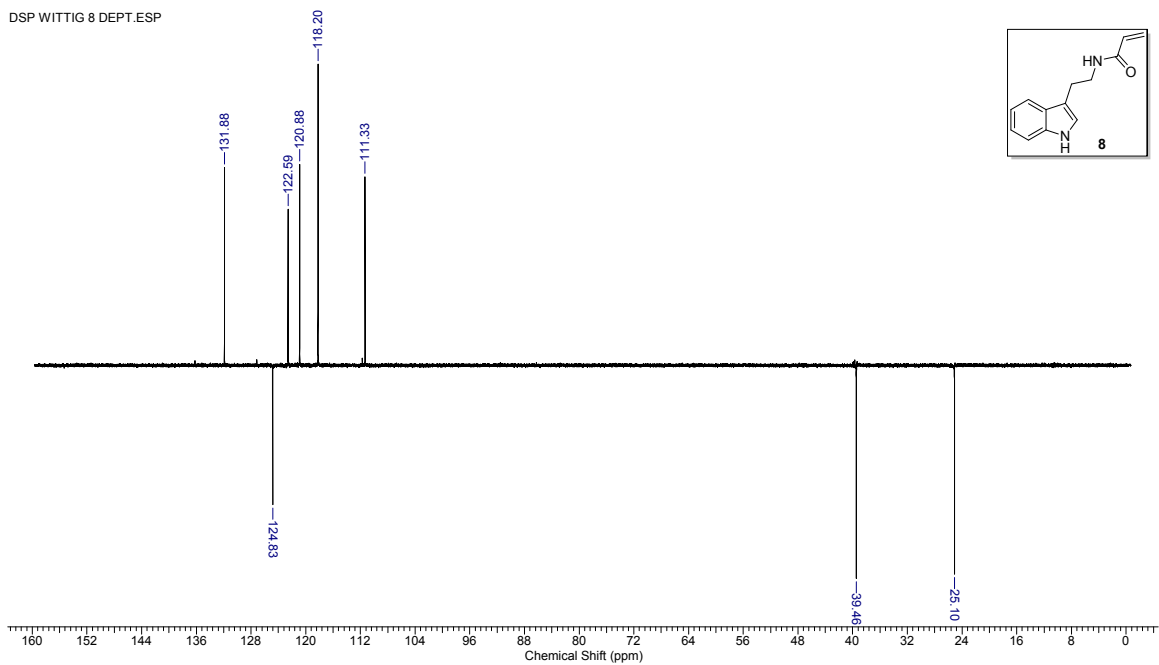

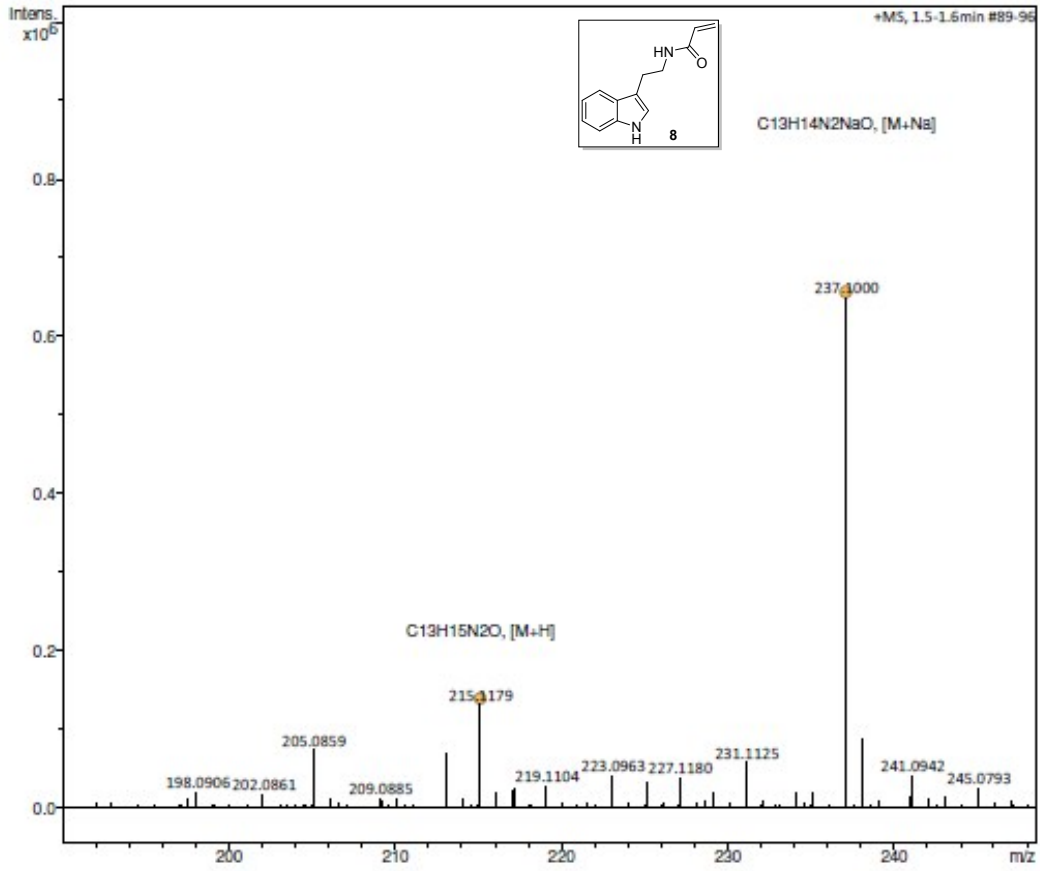

DSP P5 1H.ESP

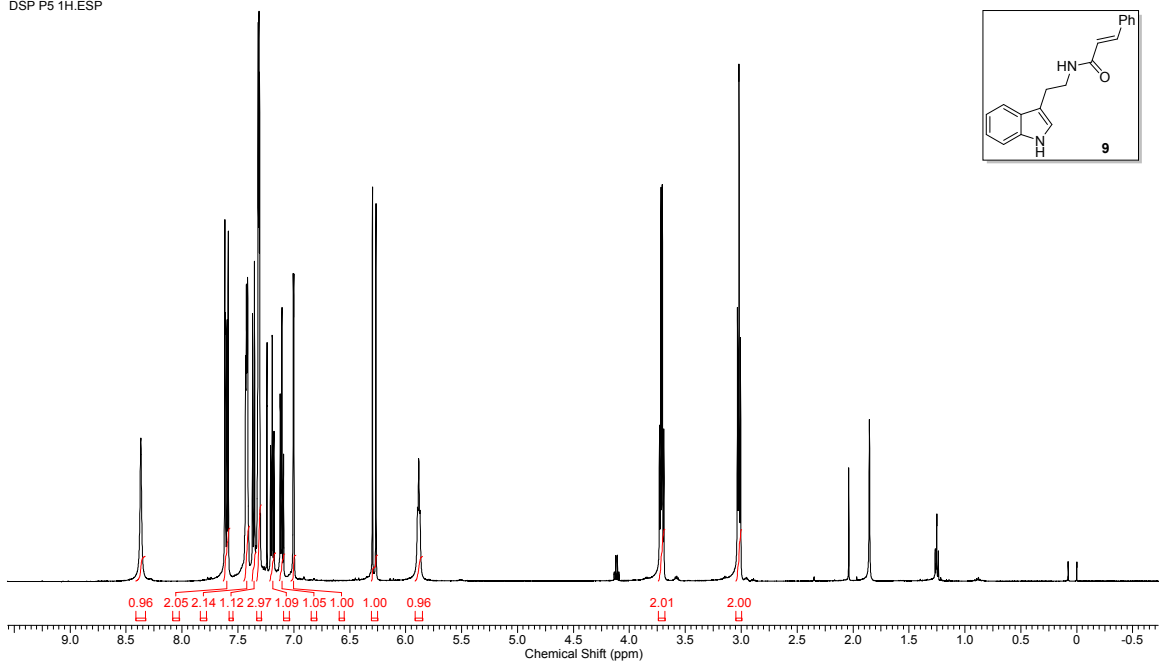

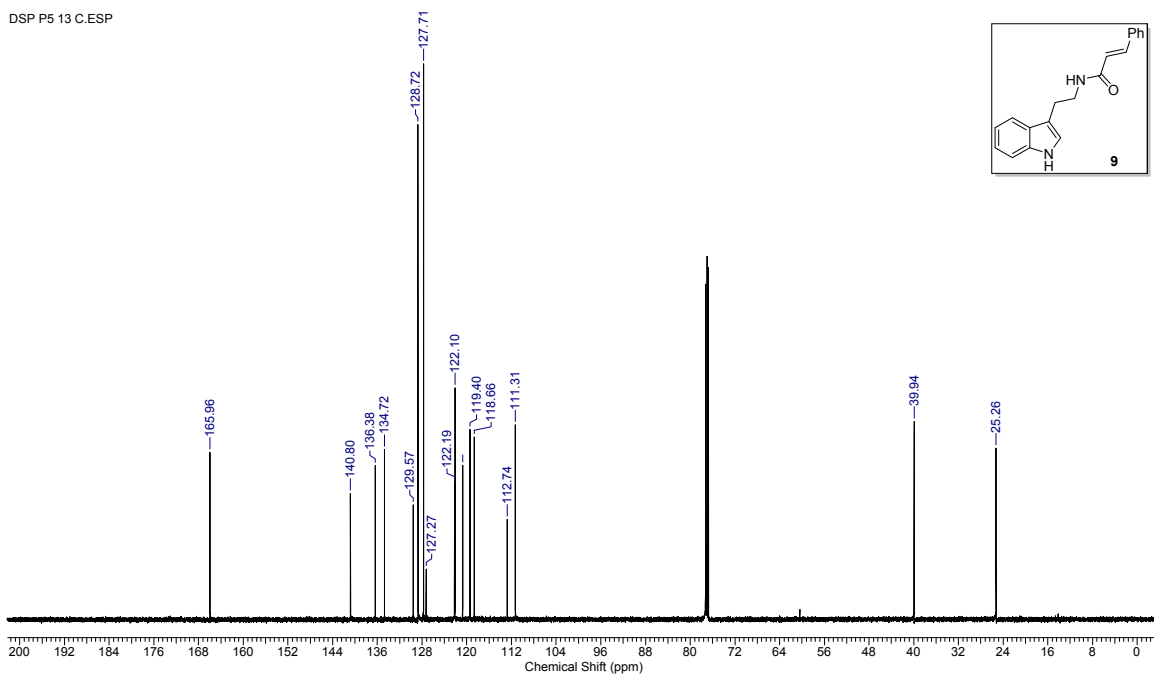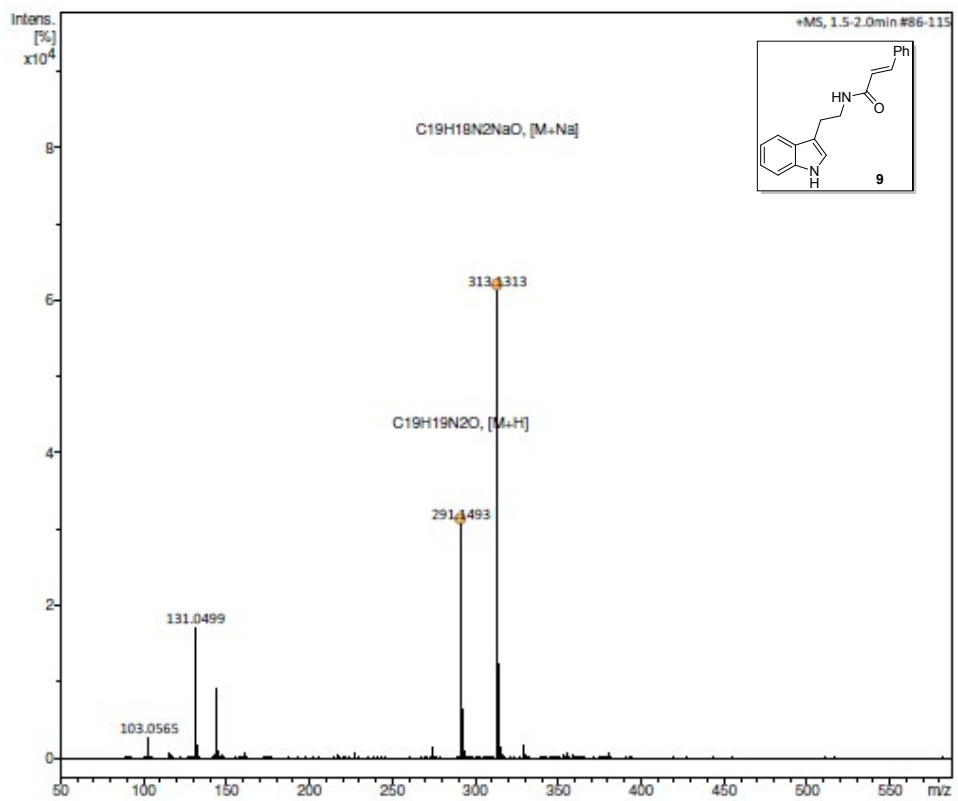

Supplement: c5nj03533c1.pdf [file c5nj03533c1.pdf]
